# Supplementary material for: Comparison of accelerometer measured levels of physical activity and sedentary time between obese and non-obese children and adolescents: a systematic review
Source: BMC Pediatr. 2018 Mar 9;18:106. doi: 10.1186/s12887-018-1031-0 (PMC5844092; doi:10.1186/s12887-018-1031-0)
Supplement: Supplementary file 2 — Study Quality Assessment Criteria, modified from Tooth et al. (22). MVPA: Moderate-to-Vigorous Intensity Physical Activity (XLSX 34 kb) [file 12887_2018_1031_MOESM2_ESM.xlsx]

## Sheet: Sheet1
	Additional file 2: Methodological Quality Assessment Criteria, modified from Tooth et al. (23)
	Criterion	Definition	Mark Allocation
	Sample recruitment.	Sample: How were participants recruited.	Item was scored positive if three points were mentioned
		Time: when was the study conducted.
		Place: where did the recruitment take place.
	Sample description of the sample.	Number of participants recruited	Item was scored positive if all three points were mentioned
		Mean age or % age of participants
		% Gender male and female
	Attrition	Number of participants recruited and the number actually measured	Item was scored positive if all both points were mentioned
	Data collection and reduction	Type of device; epoch; no of days of active commuting specified as minimum; duration of monitoring time; monitor placement; data reduction decisions	Item was scored positive if at least three points were mentioned
	MVPA definition given	MVPA defined (accelerometer cut-off were referenced or other method given)	Item was scored positive if points were mentioned
	Results	Adequate description of numbers actually analysed, with summary MVPA data	Item was scored positive if all both points were mentioned
	MVPA: Moderate-to-Vigorous Intensity Physical Activity.
